# Supplementary material for: [Ru(N∧N∧N)2-Ce]-based framework for photocatalytic sulfide oxidation and hydrogen production
Source: Royal Society of Chemistry journal article supplement (doi:10.1039/d2ce00397j), 2022-01-01
Supplement: d2ce00397j1.pdf [file d2ce00397j1.pdf]

Electronic Supporting Information

## **[Ru(N<sup>□</sup>N<sup>□</sup>N)<sub>2</sub>-Ce]-based Framework for Photocatalytic Sulfides**

### **Oxidation and Hydrogen Production**

Yong-Hui Yu, Sheng-Li Huang\*, Guo-Yu Yang\*

MOE Key Laboratory of Cluster Science, Beijing Key Laboratory of School of Chemistry and Chemical Engineering, Beijing Institute of Technology, Beijing, 100081, P. R. China;

## Experimental

### Materials and methods

4'-(4-Methoxycarbonylphenyl)-2,2':6',2''-terpyridine was synthesized according to a published procedure<sup>1</sup>. The [(4'-(4-carboxylphenyl)tpy)<sub>2</sub>Ru](OTf)<sub>2</sub> (Ru(cptpy)<sub>2</sub>) was synthesized according to previous report with slight modifications<sup>2</sup>, and all other chemicals and solvents employed in this work were used without any further purification. Single-crystal X-ray diffraction (SCXRD) data were collected using the Bruker ApexII Duo. IR spectra (KBr pellets) were recorded on Thermo Fisher Scientific FT-IR spectrometer (Thermo IS5). TGA was performed on a Mettler Toledo TGA/DSC 1000 analyzer under N<sub>2</sub> atmosphere at a heating rate of 10°C min<sup>-1</sup>. Powder X-ray diffraction (PXRD) spectra were measured by Bruker D8 Advance XRD diffractometer with Cu K $\alpha$  radiation ( $\lambda = 1.54056 \text{ \AA}$ ). Solid UV-Vis absorption spectra were recorded on a UV-2600 220V CH spectrometer (Shimadzu, Japan). NMR spectra were acquired on a Bruker Avance IIIHD spectrometer (<sup>1</sup>H at 400 MHz, <sup>13</sup>C at 700 MHz). X-ray photoelectron spectroscopy (XPS) was taken on 5000 Versaprobe III. Photocurrent measurements and electrochemical impedance spectroscopy (EIS) were measured on a CHI 760E electrochemical work station. The reactions of photocatalytic sulfides oxidation were carried out on a multi-channel photochemical reaction system featuring 10 W 450 nm LED lamps and monitored by gas chromatograph (GC-2014C Shimadzu). The reactions of photocatalytic hydrogen production were achieved in a top-irradiation reactor attached to a gas-closed glass system equipped with a 300 W Xenon arc lamp (CEL-HXF300, Au-Light, China). The generated H<sub>2</sub> was monitored by gas chromatograph (GC-2014C Shimadzu).

### Synthesis of [(4'-(4-carboxylphenyl)tpy)<sub>2</sub>Ru](OTf)<sub>2</sub> (Ru(cptpy)<sub>2</sub>)

A mixture of RuCl<sub>3</sub>·3H<sub>2</sub>O (130 mg, 0.5 mmol), 4'-(4-Methoxycarbonylphenyl)-2,2':6',2''-terpyridine (367 mg, 1 mmol), AgOTf (385 mg, 1.5 mmol) and DMA were added to a round-bottomed flask. The solution was refluxed for 24 hours under nitrogen atmosphere. After cooling at room temperature, AgCl was removed by filtration. Then the solvents were evaporated. The product was washed with ethyl acetate and dried to gain the dark red solid [(4'-(4-Methylcarboxylphenyl)tpy)<sub>2</sub>Ru](OTf)<sub>2</sub>. Finally, [(4'-(4-Methylcarboxylphenyl)tpy)<sub>2</sub>Ru](OTf)<sub>2</sub> was dissolved in aqueous solution of LiOH (4 M). After stirring for 12 h at 80 °C, the solution is made acidic with HNO<sub>3</sub> to give a heavy precipitate. The solid is filtered and washed with water, then dried in vacuo, yield 80%.

### Synthesis of Ce-1 (Ce[Ru(cptpy)<sub>2</sub>](NO<sub>3</sub>)<sub>4</sub>)

Ce(NO<sub>3</sub>)<sub>3</sub>·6H<sub>2</sub>O (0.045 g, 0.1 mmol), Ru(cptpy)<sub>2</sub> (0.017 g, 0.015 mmol), 2-fluorobenzoic acid (0.112 g, 0.8 mmol) and HNO<sub>3</sub> (3.5 M, 1.3 mL) were added to a 20 mL Pyrex vial with a mixed solvents of DMF (10 mL) and H<sub>2</sub>O (0.5 mL), and it was ultrasonized for 10 minutes at room temperature. Then the mixture was placed in a preheated oven at 100 °C for 48 h. Dark red crystals of suitable size for single X-ray analysis were obtained (yield 93% based on (Ru(cptpy)<sub>2</sub>). The crystals were washed with DMF and EtOH, and air-dried at room temperature.

### Synthesis of Ce-2 (Ce[Ru(cptpy)<sub>2</sub>](OH)(NO<sub>3</sub>)<sub>3</sub>)

Ce(NH<sub>4</sub>)<sub>2</sub>(NO<sub>3</sub>)<sub>6</sub> (0.055 g, 0.1 mmol), Ru(cptpy)<sub>2</sub> (0.017 g, 0.015 mmol), 2-fluorobenzoic acid

(0.112 g, 0.8 mmol) and HNO<sub>3</sub> (3.5 M, 1.3 mL) were added to a 20 mL Pyrex vial with a mixed solvents of DMF (10 mL) and H<sub>2</sub>O (0.5 mL), and it was ultrasonized for 10 minutes at room temperature. Then the mixture was placed in a preheated oven at 100 °C for 48 h. Dark red crystals of suitable size for single X-ray analysis were obtained (yield 91% based on (Ru(cptpy)<sub>2</sub>). The crystals were washed with DMF and EtOH, and air-dried at room temperature.

### **Synthesis of Ce/Zr-3 and Zr-3**

Ce(NH<sub>4</sub>)<sub>2</sub>(NO<sub>3</sub>)<sub>6</sub> (0.002 g, 0.004 mmol), ZrOCl<sub>2</sub> (0.005 g, 0.016 mmol), Ru(cptpy)<sub>2</sub> (0.034 g, 0.03 mmol), HCOOH (3.25 mL) were added to a 20 mL Pyrex vial with a mixed solvents of DMF (8 mL) and H<sub>2</sub>O (4 mL), and it was ultrasonized for 10 minutes at room temperature. Then the mixture was placed in a preheated oven at 120 °C for 48 h. Dark red crystals were obtained. The crystals were washed with DMF and EtOH, and air-dried at room temperature. The **Zr-3** was synthesized according to previous reports.

### **Single X-ray Analysis**

The X-ray diffraction data were collected on a Bruker SMART APEX2-CCD diffractometer with graphite-monochromated Mo K $\alpha$  ( $\lambda = 0.71073 \text{ \AA}$ ) at 296 K. The program SADABS was used for the absorption correction. The structures were solved by the direct method and refined on F<sup>2</sup> by the full-matrix least squares methods using the SHELX-2014/2018 program package. Crystallographic data collection and refinement results are summarized in Table S1 and Table S2.

### **Photoelectrochemical measurements**

Photocurrent tests of **Ce-1** and **Ce-2** were performed in a standard three-electrode system with the ITO as the working electrode, Pt plate as the counter electrode, and an Ag/AgCl as a reference electrode. The 0.1 M Na<sub>2</sub>SO<sub>4</sub> solution was used as electrolyte. 5 mg **Ce-1** or **Ce-2** was dispersed into a mixed solution with 1 mL ethanol and 40  $\mu$ L 5 wt% Nafion. Then 80  $\mu$ L suspension was dropped onto the surface of the ITO glass with an area of 1 cm<sup>2</sup> and dried in air. The photo-responsive signals of **Ce-1** or **Ce-2** were recorded under irradiation of a 300 W Xe lamp.

EIS of **Ce-1** and **Ce-2** were performed in a standard three-electrode system with the glassy carbon as the working electrode, Pt plate as counter electrode, and an Ag/AgCl as a reference electrode. The 0.1 M Na<sub>2</sub>SO<sub>4</sub> aqueous solution was used as the electrolyte. 5 mg **Ce-1** or **Ce-2** was dispersed into 1 mL ethanol. Then 5  $\mu$ L suspension was dropped onto the surface of the glassy carbon and dried in air. The EIS plots of **Ce-1** or **Ce-2** were recorded.

### **Procedures of Ce-1, Ce-2 and Ce/Zr-3 photocatalyzed sulfide oxidation**

0.1 mmol Sulfide, 5 mg **Ce-1**, **Ce-2** or **Ce/Zr-3** and 5 mL CH<sub>3</sub>OH were added to a 10 mL quartz bottle pumped with O<sub>2</sub>. Subsequently, the sample was irradiated with a 10 W LED light ( $\lambda = 450 \text{ nm}$ ) and stirred at room temperature. After reaction, the products were detected by GC.

### **Procedures of Ce-1 or Ce-2 photocatalyzed hydrogen production**

Photocatalytic hydrogen production experiments were performed in a top-irradiation reactor attached to a gas-closed glass system. 10 mg **Ce-1/Ce-2** was dispersed in a mixed solution of 50 mL water containing 0.01 M TEOA and H<sub>2</sub>PtCl<sub>6</sub> aqueous solution (Pt content: 3 wt %). Then the reaction system was degassed under vacuum to remove air. Subsequently, the sample was irradiated

with a 300 W Xenon lamp and stirred at 6 °C. After the reaction, the generated H<sub>2</sub> was analyzed by using a gas chromatograph with high-purity argon carrier gas.

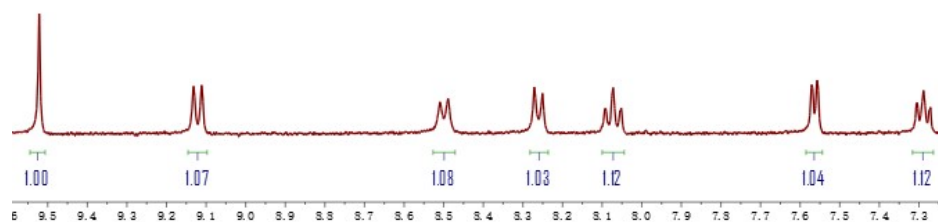

**Figure S1.** (a) <sup>1</sup>H NMR of Ru(cptpy)<sub>2</sub> in d<sub>6</sub>-dmsd at 400 MHz. <sup>1</sup>H NMR (400 MHz, DMSO-d<sub>6</sub>, ppm): δ = 9.52 (s, 1H), 9.12 (d, *J* = 8.1 Hz, 1H), 8.50 (d, *J* = 8.1 Hz, 1H), 8.26 (d, *J* = 8.0 Hz, 1H), 8.11 – 8.03 (m, 1H), 7.56 (d, *J* = 5.5 Hz, 1H), 7.29 (t, *J* = 6.4 Hz, 1H).

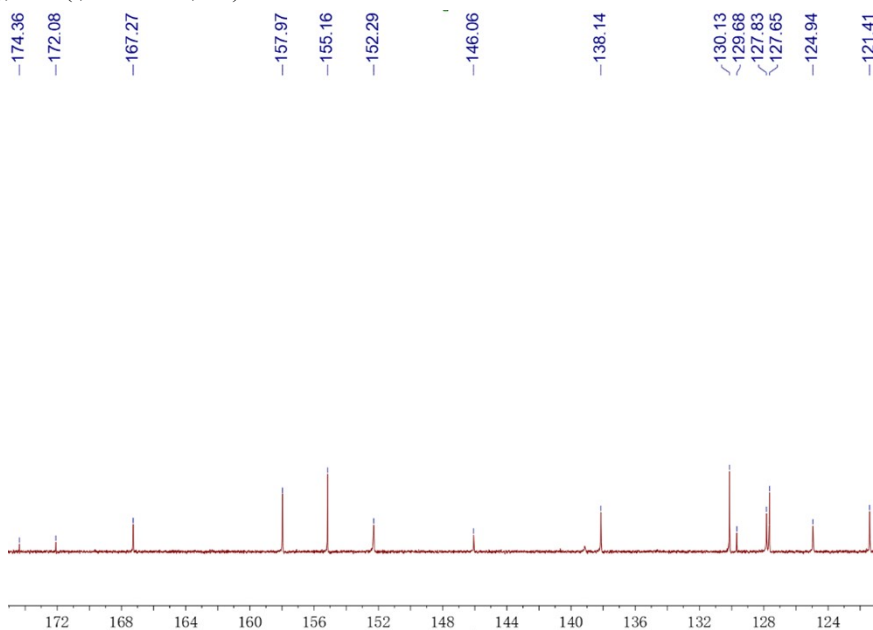

**Figure S1.** (b) <sup>13</sup>C NMR of Ru(cptpy)<sub>2</sub> in d<sub>6</sub>-dmsd at 700 MHz. <sup>13</sup>C NMR (700 MHz, DMSO-d<sub>6</sub>, ppm): δ = 174.36, 172.08, 167.27, 157.97, 155.16, 152.29, 146.06, 138.14, 130.13, 129.68, 127.83, 127.65, 124.94, 121.41.

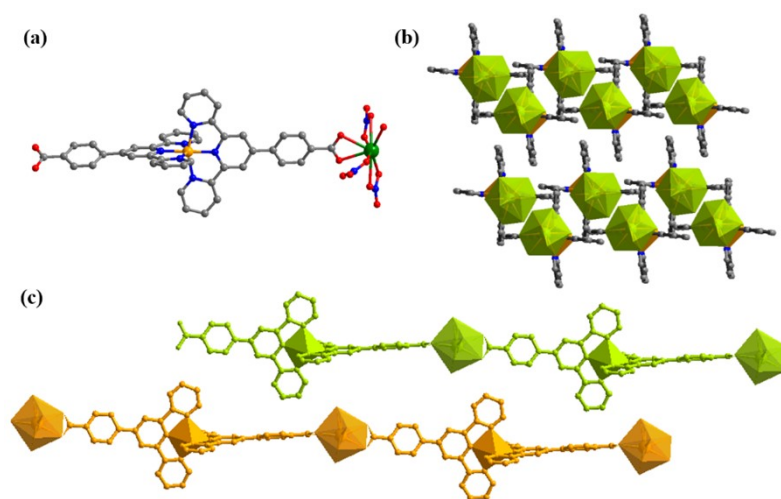

**Figure S2.** (a) The coordination environments of Ce-2 (color code: Ru, light orange; Ce, lime; C, gray; O, red; N, blue) (b) and (c) View of the 1D chain and 3D network of Ce-2.

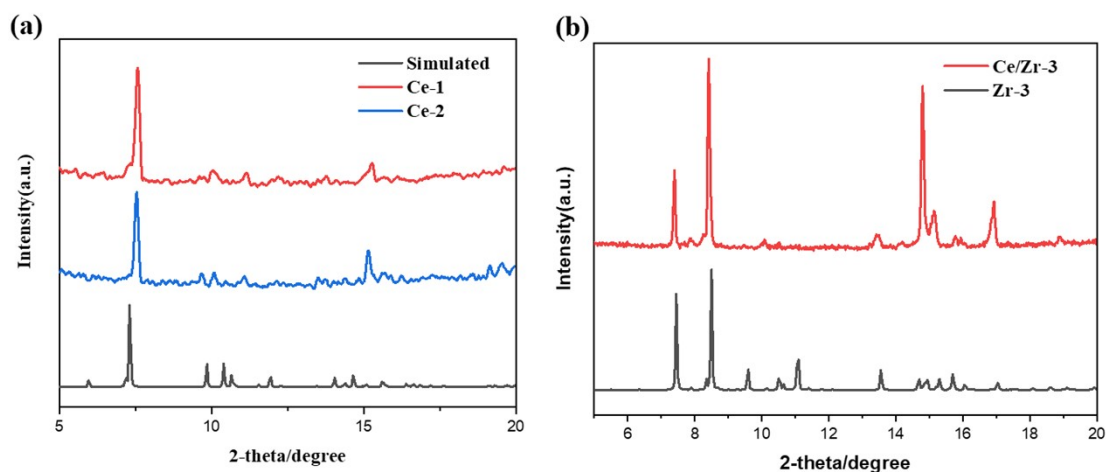

**Figure S3.** PXRD patterns for as-synthesized samples (a) Ce-1, Ce-2 and (b) Ce/Zr-3.

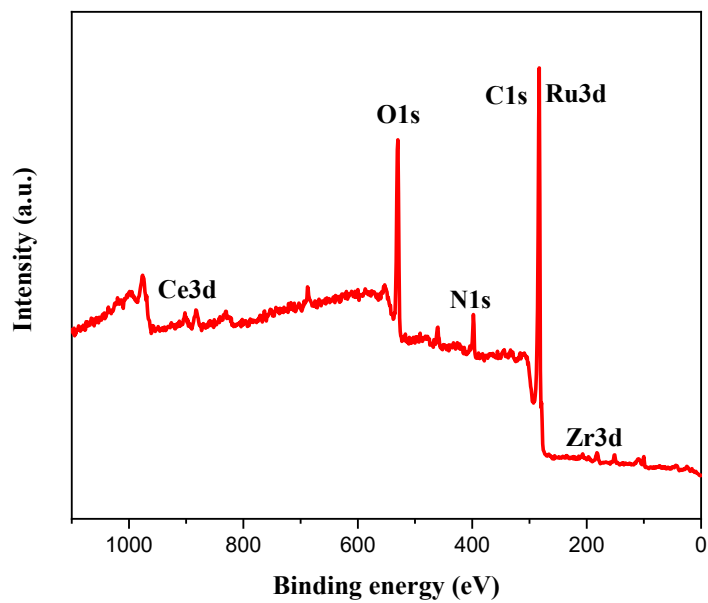

**Figure S4.** XPS spectrum of Ce/Zr-3.

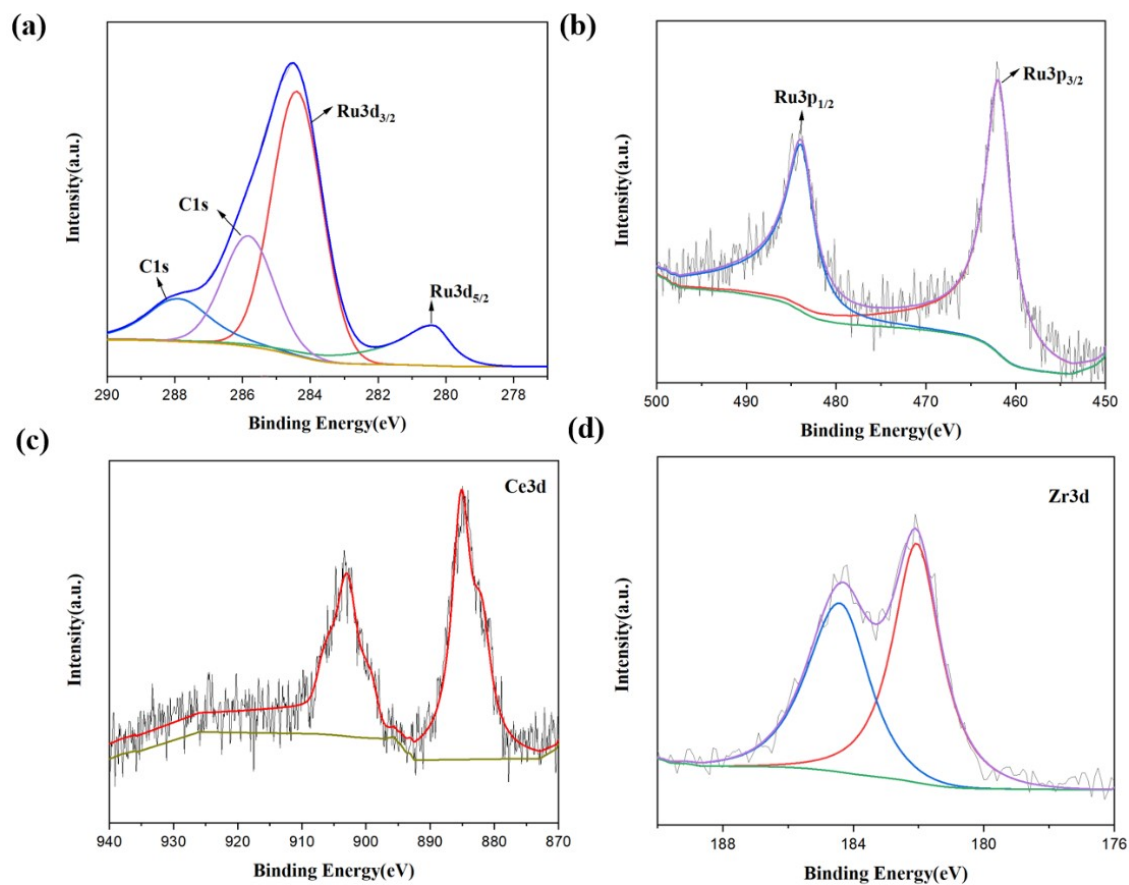

Figure S5. XPS spectrum of complex Ce/Zr-3. (a) Ru 3d, (b) Ru 3p, (c) Ce 3d, (d) Zr 3d.

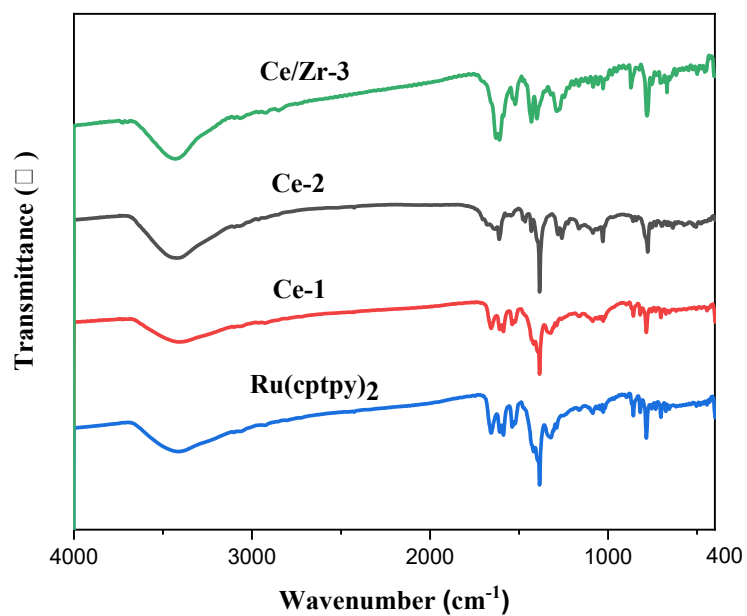

Figure S6. IR spectra of Ru(cptpy)<sub>2</sub>, Ce-1, Ce-2 and Ce/Zr-3.

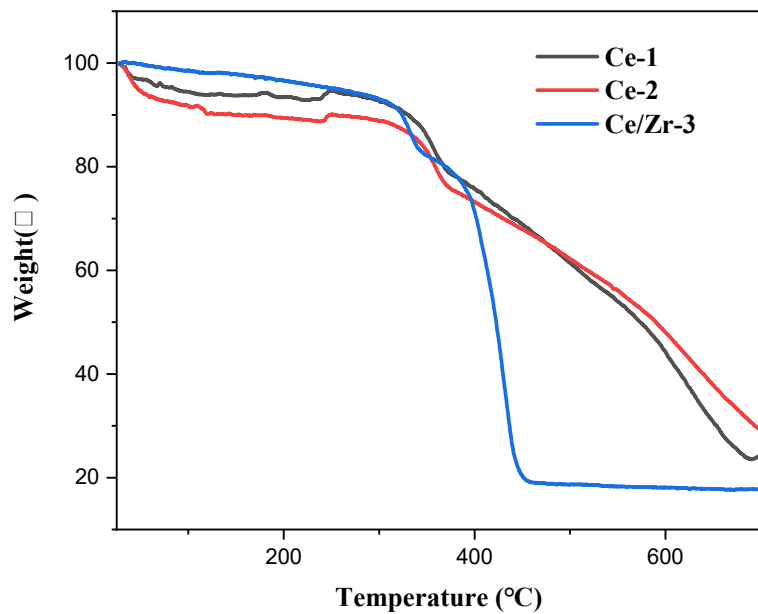

Figure S7. TGA analysis of Ce-1, Ce-2 and Ce/Zr-3.

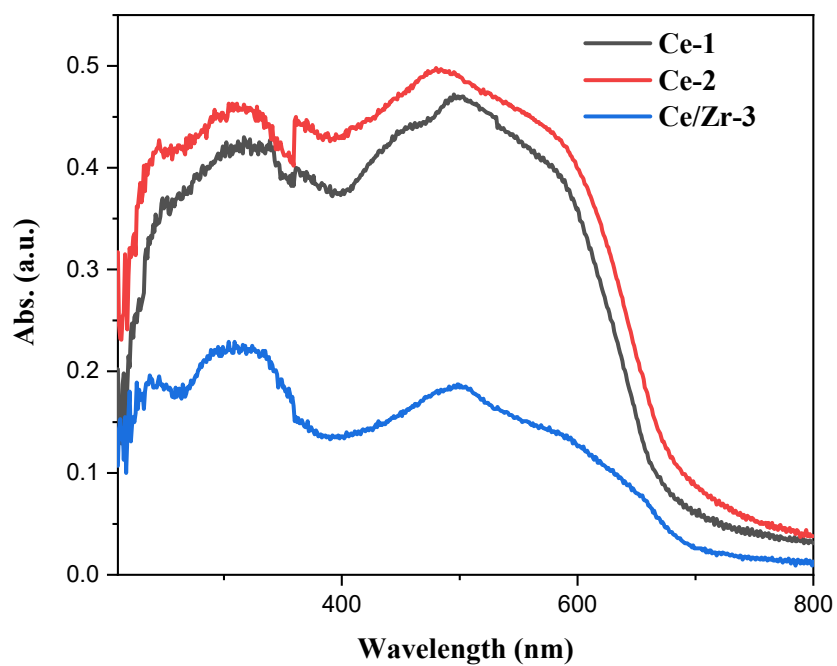

Figure S8. UV-vis absorption spectra of Ce-1, Ce-2 and Ce/Zr-3.

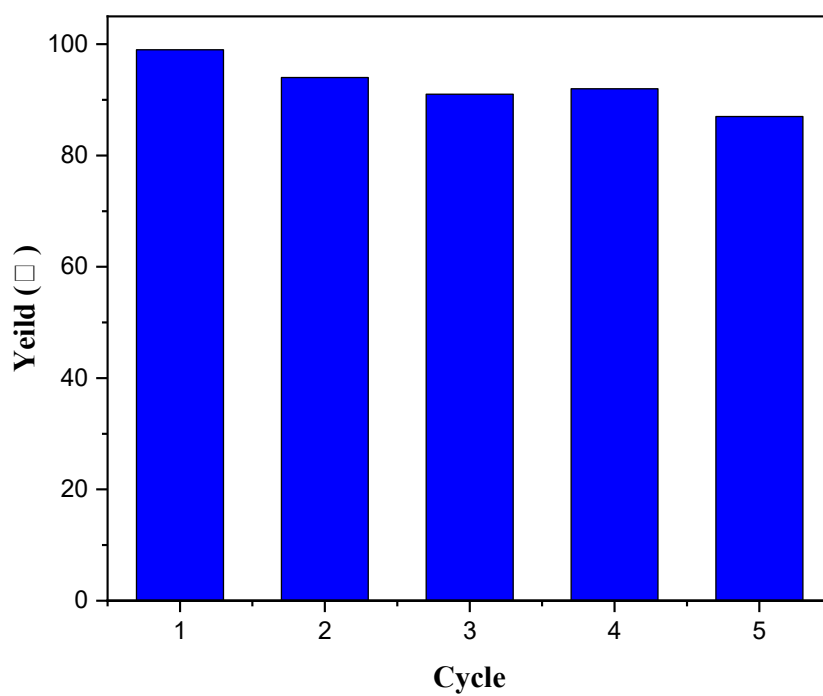

**Figure S9.** Photocatalytic activity of Ce/Zr-3 on oxidation of methylphenyl sulfide over five cycles.

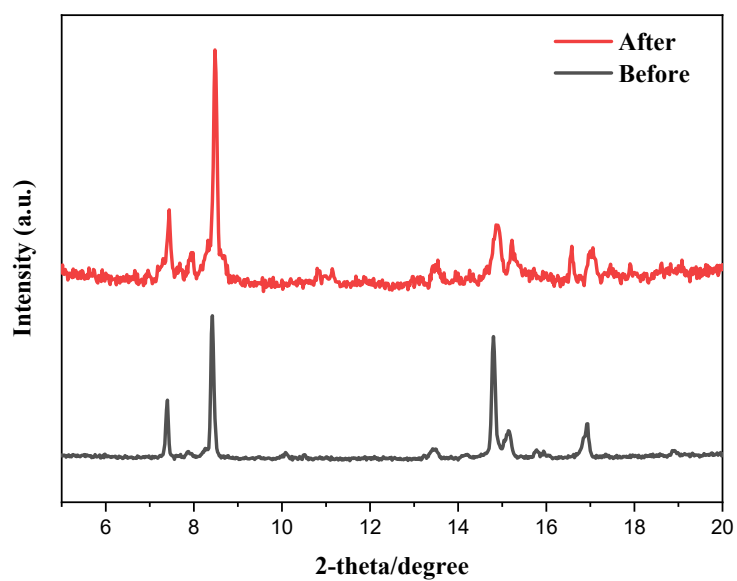

**Figure S10.** PXRD patterns of as-synthesized Ce/Zr-3 and after recycled reactions.



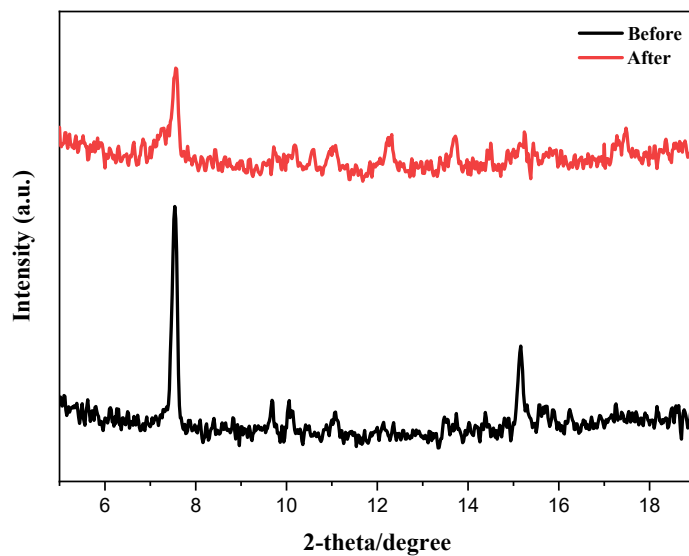

Figure S11. PXRD patterns of as-synthesized Ce-2 and after recycled reactions.

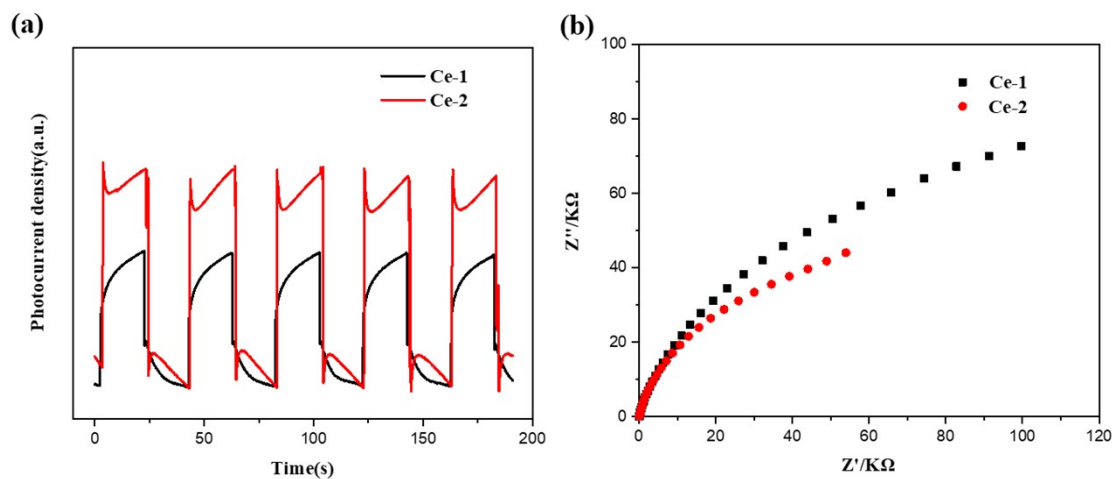

Figure S12. (a) Photocurrent tests and (b) EIS plots of Ce-1 and Ce-2.

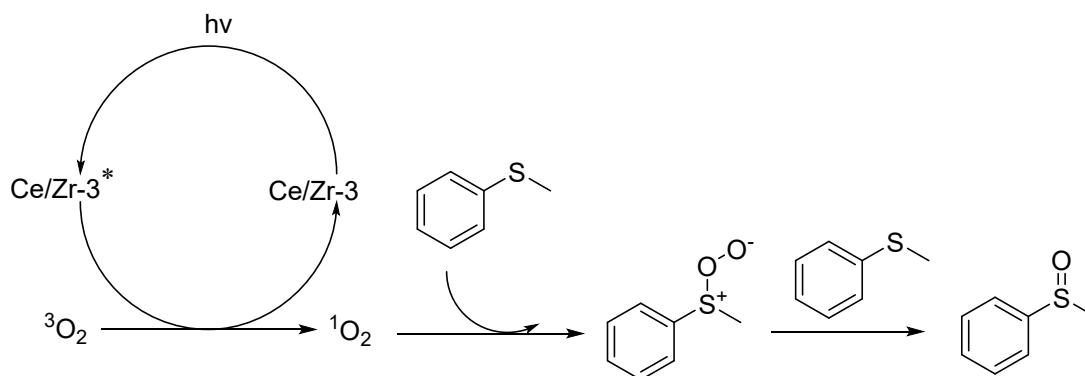

Scheme S1. Proposed reaction mechanism for photocatalytic sulfide oxidation.

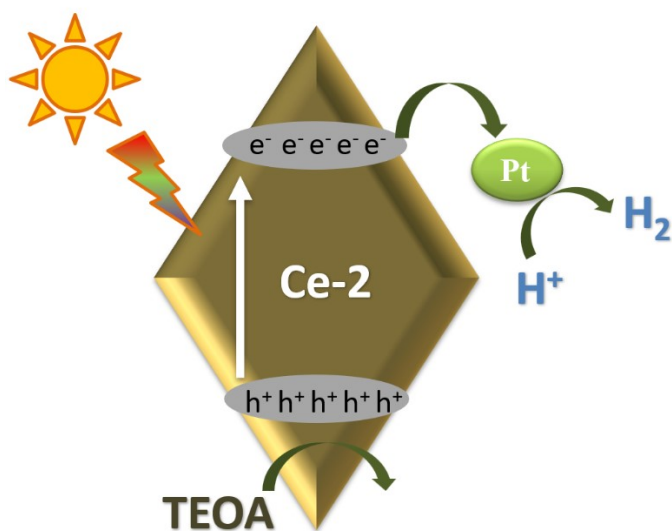

**Scheme S2.** Proposed reaction mechanism for photocatalytic hydrogen production with Pt as cocatalyst.

**Table S1** Crystal data and structure refinement for **Ce-1**

|                                        |                                                                        |
|----------------------------------------|------------------------------------------------------------------------|
| Empirical formula                      | C <sub>44</sub> H <sub>28</sub> CeN <sub>10</sub> O <sub>16</sub> Ru   |
| Formula weight                         | 1193.95                                                                |
| Temperature/K                          | 296(2)                                                                 |
| Crystal system                         | triclinic                                                              |
| Space group                            | P-1                                                                    |
| a/Å                                    | 12.978(2)                                                              |
| b/Å                                    | 14.050(3)                                                              |
| c/Å                                    | 16.307(3)                                                              |
| $\alpha$ /°                            | 107.623(6)                                                             |
| $\beta$ /°                             | 105.164(6)                                                             |
| $\gamma$ /°                            | 95.164(6)                                                              |
| Volume/Å <sup>3</sup>                  | 2688.6(8)                                                              |
| Z                                      | 2                                                                      |
| $\rho_{\text{calc}}$ g/cm <sup>3</sup> | 1.475                                                                  |
| $\mu$ /mm <sup>-1</sup>                | 1.189                                                                  |
| F(000)                                 | 1184.0                                                                 |
| Radiation                              | Mo K $\alpha$ ( $\lambda$ = 0.71073)                                   |
| 2 $\theta$ range for data collection/° | 3.602 to 60.314                                                        |
| Index ranges                           | -18 $\leq$ h $\leq$ 18, -19 $\leq$ k $\leq$ 19, -22 $\leq$ l $\leq$ 22 |
| Reflections collected                  | 36544                                                                  |
| Independent reflections                | 15335 [ $R_{\text{int}}$ = 0.0629, $R_{\text{sigma}}$ = 0.1021]        |

|                                                                                                                           |                                                   |
|---------------------------------------------------------------------------------------------------------------------------|---------------------------------------------------|
| Data/restraints/parameters                                                                                                | 15335/38/637                                      |
| Goodness-of-fit on F <sup>2</sup>                                                                                         | 1.068                                             |
| Final R indexes [I>=2σ (I)]                                                                                               | R <sub>1</sub> = 0.0712, wR <sub>2</sub> = 0.2057 |
| Final R indexes [all data]                                                                                                | R <sub>1</sub> = 0.1117, wR <sub>2</sub> = 0.2311 |
| Largest diff. peak/hole / e Å <sup>-3</sup>                                                                               | 4.57/-4.21                                        |
| $^aR_1 = \sum  F_o - F_c  /\sum F_o $ ; w R <sub>2</sub> = { $\sum[w (F_o^2-F_c^2)^2]/\sum[w (F_o^2)^2]$ } <sup>1/2</sup> |                                                   |

**Table S2** Crystal data and structure refinement for Ce-2

|                                                                                                                           |                                                                     |
|---------------------------------------------------------------------------------------------------------------------------|---------------------------------------------------------------------|
| Empirical formula                                                                                                         | C <sub>44</sub> H <sub>28</sub> CeN <sub>9</sub> O <sub>14</sub> Ru |
| Formula weight                                                                                                            | 1147.94                                                             |
| Temperature/K                                                                                                             | 296(2)                                                              |
| Crystal system                                                                                                            | triclinic                                                           |
| Space group                                                                                                               | P-1                                                                 |
| a/Å                                                                                                                       | 12.966(3)                                                           |
| b/Å                                                                                                                       | 14.216(3)                                                           |
| c/Å                                                                                                                       | 16.083(3)                                                           |
| α/°                                                                                                                       | 106.92(3)                                                           |
| β/°                                                                                                                       | 105.88(2)                                                           |
| γ/°                                                                                                                       | 94.314(19)                                                          |
| Volume/Å <sup>3</sup>                                                                                                     | 2688.9(10)                                                          |
| Z                                                                                                                         | 2                                                                   |
| ρ <sub>calc</sub> g/cm <sup>3</sup>                                                                                       | 1.418                                                               |
| μ/mm <sup>-1</sup>                                                                                                        | 1.182                                                               |
| F(000)                                                                                                                    | 1138.0                                                              |
| Radiation                                                                                                                 | Mo Kα (λ = 0.71073)                                                 |
| 2θrange for data collection/°                                                                                             | 2.784 to 50.052                                                     |
| Index ranges                                                                                                              | -15 ≤ h ≤ 15, -16 ≤ k ≤ 16, -19 ≤ l ≤ 19                            |
| Reflections collected                                                                                                     | 25432                                                               |
| Independent reflections                                                                                                   | 9485 [R <sub>int</sub> = 0.1723, R <sub>sigma</sub> = 0.1511]       |
| Data/restraints/parameters                                                                                                | 9485/42/616                                                         |
| Goodness-of-fit on F <sup>2</sup>                                                                                         | 1.024                                                               |
| Final R indexes [I>=2σ (I)]                                                                                               | R <sub>1</sub> = 0.0738, wR <sub>2</sub> = 0.1691                   |
| Final R indexes [all data]                                                                                                | R <sub>1</sub> = 0.1179, wR <sub>2</sub> = 0.1890                   |
| Largest diff. peak/hole / e Å <sup>-3</sup>                                                                               | 3.13/-2.00                                                          |
| $^aR_1 = \sum  F_o - F_c  /\sum F_o $ ; w R <sub>2</sub> = { $\sum[w (F_o^2-F_c^2)^2]/\sum[w (F_o^2)^2]$ } <sup>1/2</sup> |                                                                     |

**Table S3** Control reactions of the photocatalytic H<sub>2</sub> production reaction for the reaction time of 6 h.

| Entry | Catalyst                     | Cocatalyst | Sacrificial reagent | Light   | H <sub>2</sub> production rate                             |
|-------|------------------------------|------------|---------------------|---------|------------------------------------------------------------|
| 1     | <b>Ce-1</b>                  | Yes        | TEOA                | Xe lamp | 2.6 $\mu\text{mmol}\cdot\text{g}^{-1}\cdot\text{h}^{-1}$   |
| 2     | <b>Ce-2</b>                  | Yes        | TEOA                | Xe lamp | 108.5 $\mu\text{mmol}\cdot\text{g}^{-1}\cdot\text{h}^{-1}$ |
| 3     | <b>Ce-2</b>                  | Yes        | None                | Xe lamp | n.d.                                                       |
| 4     | <b>Ce-2</b>                  | Yes        | TEOA                | None    | n.d.                                                       |
| 5     | <b>Ru(cptpy)<sub>2</sub></b> | Yes        | TEOA                | Xe lamp | n.d.                                                       |

### Supporting References

1. E. C. Constable, E. L. Dunphy, C. E. Housecroft, M. Neuburger, S. Schaffner, F. Schapera and S. R. Batten, *Dalton trans.*, 2007, 38,4323–32.
2. M. Elcheikh Mahmoud, H. Audi, A. Assoud, T. H. Ghaddar and M. Hmadeh, *J. Am. Chem. Soc.*, 2019, **141**, 7115-7121.
